# Supplementary material
Source: PubMed Central journal article supplement (PMC5890822)
Supplement: NIHMS948473-supplement-supplement_1.pdf [file NIHMS948473-supplement-supplement_1.pdf]

**Supplementary Table 1.** *Factor loadings of performance variables on neurocognitive constructs.*

| Neurocognitive Factor Loadings | Processing<br>Speed<br>(F1) | Visuospatial<br>Working<br>Memory<br>(F2) | Phonological<br>Working<br>Memory<br>(F3) | Behavioral<br>Inhibition (F4) |
|--------------------------------|-----------------------------|-------------------------------------------|-------------------------------------------|-------------------------------|
| MRT1                           | <b>0.78</b>                 | 0.01                                      | -0.12                                     | 0.22                          |
| MRT2                           | <b>0.91</b>                 | 0.02                                      | 0.05                                      | 0.12                          |
| MRT3                           | <b>0.86</b>                 | 0.02                                      | -0.02                                     | 0.20                          |
| MRT4                           | <b>0.74</b>                 | -0.08                                     | 0.09                                      | 0.30                          |
| SSD1                           | 0.13                        | 0.08                                      | 0.09                                      | <b>0.78</b>                   |
| SSD2                           | 0.51                        | 0.10                                      | 0.05                                      | <b>0.69</b>                   |
| SSD3                           | 0.46                        | 0.24                                      | 0.07                                      | <b>0.64</b>                   |
| SSD4                           | 0.47                        | 0.02                                      | 0.18                                      | <b>0.63</b>                   |
| PH4                            | 0.01                        | 0.33                                      | <b>0.80</b>                               | -0.09                         |
| PH5                            | 0.05                        | 0.24                                      | <b>0.86</b>                               | 0.21                          |
| PH6                            | -0.04                       | 0.31                                      | <b>0.82</b>                               | 0.20                          |
| VS3                            | -0.07                       | <b>0.80</b>                               | 0.23                                      | 0.04                          |
| VS4                            | -0.02                       | <b>0.89</b>                               | 0.14                                      | 0.11                          |
| VS5                            | 0.05                        | <b>0.84</b>                               | 0.27                                      | 0.14                          |
| VS6                            | 0.08                        | <b>0.82</b>                               | 0.27                                      | 0.05                          |

Note: Principal components extraction with varimax rotation. Consistent with prior work (Kofler et al., 2016), phonological set size 3 was excluded for failing to load with any other variables. Loadings > .55 are bolded. MRT = mean reaction time to correct go trials (milliseconds); PH = phonological working memory (stimuli correct per trial); SSD = stop-signal delay (milliseconds); VS = visuospatial working memory (stimuli correct per trial).
